# Supplementary material for: A power-free, filter-free and high-performance narrowband ZnO/BaTiO 3 /GaN heterojunction-based ultraviolet photodetector obtained by synergetic plasmonic and ferroelectric effects
Source: Royal Society of Chemistry journal article supplement (doi:10.1039/d4tc03900a), 2024-01-01
Supplement: d4tc03900a1.pdf [file d4tc03900a1.pdf]

Electronic supplementary information

**Power-free, filter-free and high-performance narrowband  
ZnO/BaTiO<sub>3</sub>/GaN heterojunction ultraviolet photodetector  
induced by synergetic plasmonic and ferroelectric effects**

Kai Tang, Shulin Sha, Maosheng Liu, Mengxin Yu, Peng Wan, Caixia Kan, Daning Shi\*, Mingming Jiang\*

College of Physics, MIIT Key Laboratory of Aerospace Information Materials and Physics, Key Laboratory for Intelligent Nano Materials and Devices, Nanjing University of Aeronautics and Astronautics, Nanjing 211106, China

**\*Corresponding authors:**

Daning Shi (Email: shi@nuaa.edu.cn);

Mingming Jiang (Email: mmjiang@nuaa.edu.cn).

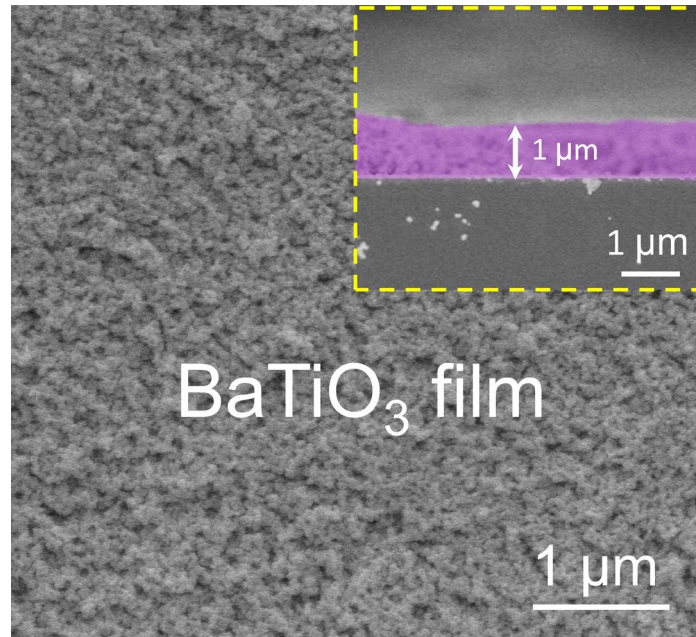

**Figure S1.** SEM images of the surface and cross-sectional of BaTiO<sub>3</sub> nanocrystals film on the p-GaN substrate.

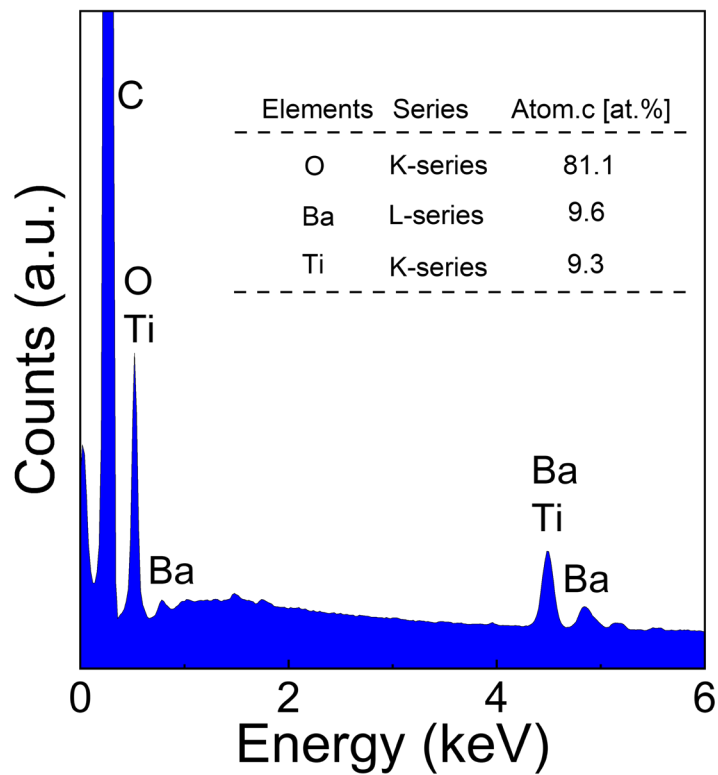

**Figure S2.** EDX spectra of BaTiO<sub>3</sub> nanocrystals film.

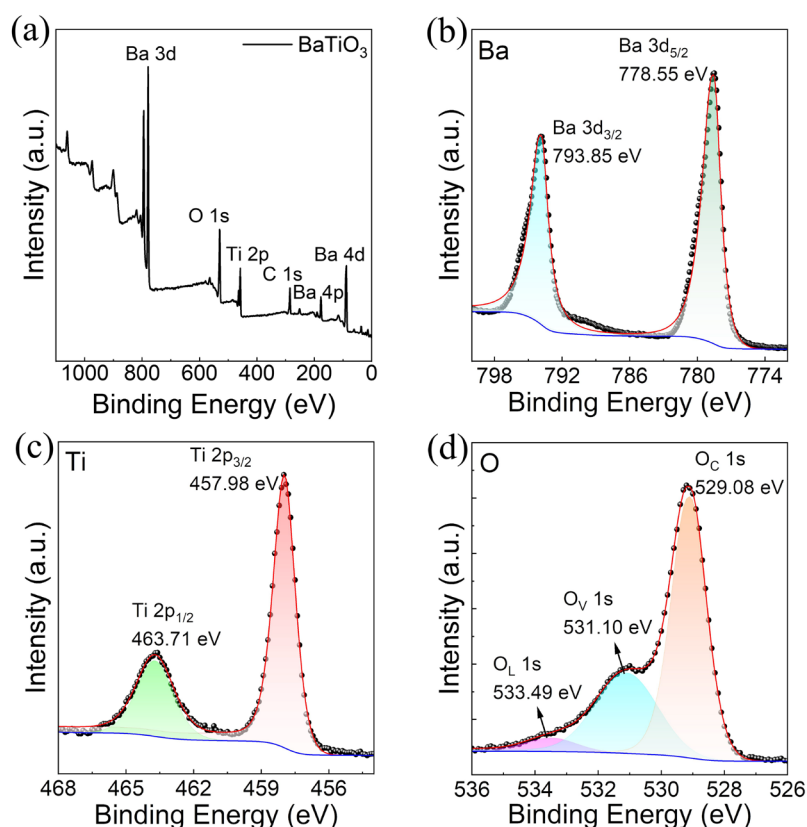

**Figure S3.** (a) XPS survey spectrum of the BaTiO<sub>3</sub> nanocrystals film. High resolution XPS spectra for (b) Ba 3d, (c) Ti 2p and (d) O 1s, respectively.

Fig. S3(a) is the XPS wide-scan spectrum of BaTiO<sub>3</sub> film over a range of 0 ~ 1100 eV. Obvious signals corresponding to Ti, Ba, and O further reveal the growth of BTO. Fig. S3(b)-(c) show the XPS fine spectra of Ba, Ti, and O. The Ba 3d spectrum consists of two peaks located at 778.55 (Ba 3d<sub>5/2</sub>) and 793.85 eV (Ba 3d<sub>3/2</sub>) from the Ba<sup>2+</sup> oxide state. In addition, the Ti 2p spectrum possesses two peaks located at 457.98 and 463.71 eV, corresponding to Ti 2p<sub>3/2</sub> and Ti 2p<sub>1/2</sub> of Ti<sup>4+</sup> in BTO, respectively. No obvious signal for Ti<sup>3+</sup> can be found in the Ti 2p XPS spectrum. The O 1s spectrum consists of three symmetrical signals, that is, at the binding energies of 529.08 eV, 531.10 eV, and 533.49 eV, which are assigned to the chemisorbed oxygen species (O<sub>C</sub>), oxygen vacancy (O<sub>V</sub>), and lattice oxygen (O<sub>L</sub>), respectively. Fine fitting yields a relative ratio of oxygen vacancies, O<sub>V</sub>/(O<sub>L</sub>+O<sub>V</sub>), equal to 84.5%, which is considered to be controlled by the solution-precursor decomposition cum crystallization process during the BaTiO<sub>3</sub> fabrication.<sup>1</sup>

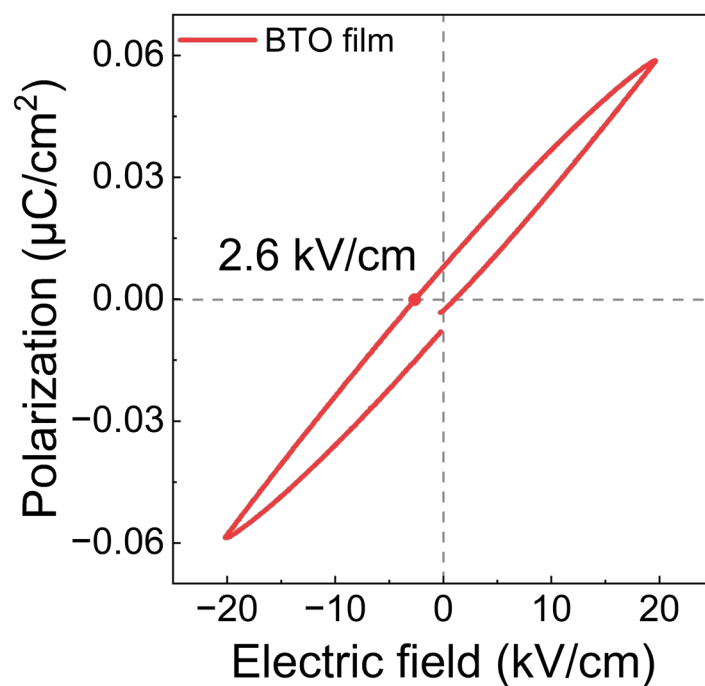

**Figure S4.** The  $P$ - $E$  hysteresis loop of BaTiO<sub>3</sub> nanocrystals film at room temperature.

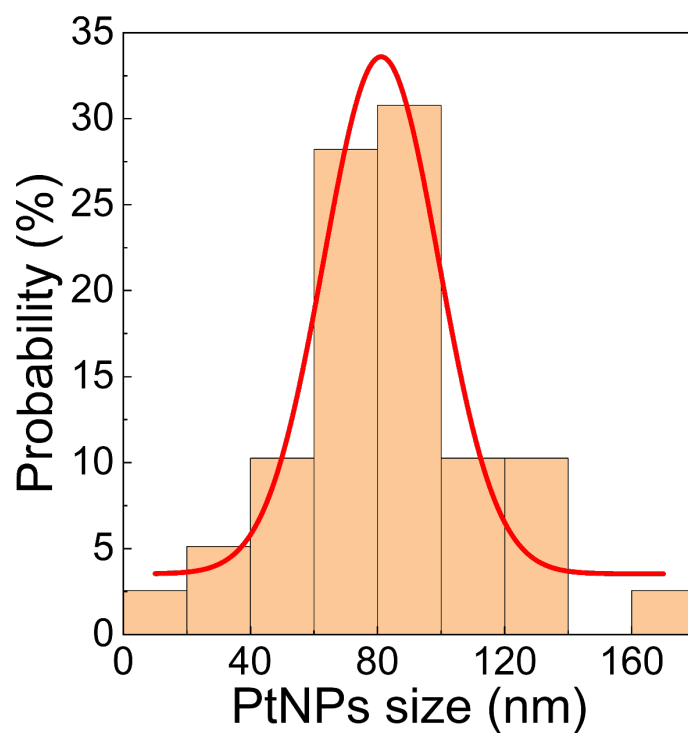

**Figure S5.** Particle size distribution of PtNPs.

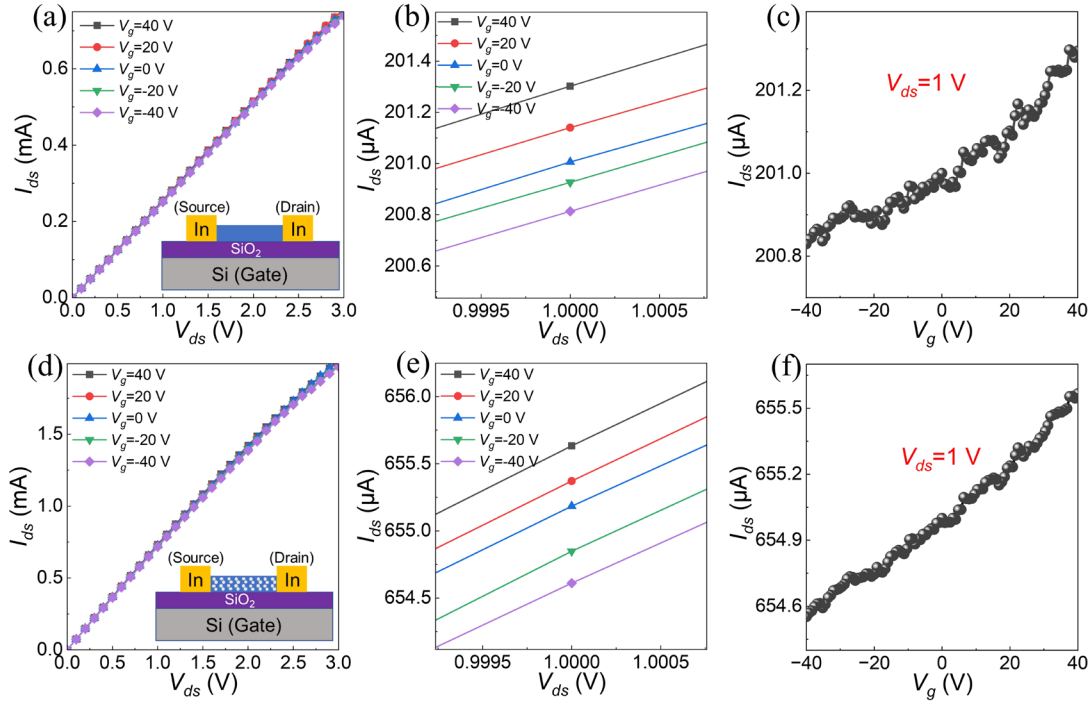

**Figure S6.** Electrical transport characterization of an individual MW-based FET devices, in which a ZnO:Ga MW was uncoated and coated with PtNPs. (a)  $I_{ds}$ - $V_{ds}$  curves of a naked ZnO:Ga MW based FET device at different gate voltage ( $V_g$ ). Inset: schematic illustration of a ZnO:Ga MW based FET. (b) The partial view of the  $I_{ds}$ - $V_{ds}$  curves at around  $V_{ds} = 1$  V. (c)  $I_{ds}$ - $V_g$  curve at  $V_{ds} = 1$  V. As the ZnO:Ga MW FET device was surface-coated using PtNPs, (d)  $V_g$ -dependent  $I_{ds}$ - $V_{ds}$  curves measurement result, and the inset shows a diagram of PtNPs@ZnO:Ga MW based FET. (e) The partial view of the  $I_{ds}$ - $V_g$  curves at around  $V_{ds} = 1$  V. (f)  $I_{ds}$ - $V_g$  plotted at  $V_{ds} = 1$  V.

The modulation of PtNPs on electrical transport characteristics of a ZnO:GaMW was measured using a single wire-based field-effect transistors (FETs). Two In particles are utilized as the (source/drain) electrode on both ends of a single wire, which is placed on a SiO<sub>2</sub>/Si substrate, with Si serving as the gate electrode. A schematic diagram of a ZnO:Ga MW FET device is shown in the inset of Fig. S6(a). The drain-source current versus drain-source voltage ( $I_{ds}$ - $V_{ds}$ ) curves measured at different gate voltages ( $V_g$ ) are shown in Fig. S6(a), which reveals that the output characteristics of ZnO:Ga MW FET show a linear behavior. It confirms the Ohmic contacts between the ZnO:Ga MW and In electrodes. Fig. S6(b) shows an amplified  $I_{ds}$ - $V_{ds}$  curves near  $V_{ds} = 1$  V. Clearly, the

$I_{ds}$  increases (declines) with the forward (reverse)  $V_g$ . In Fig. S6(c), the  $I_{ds}$  curve demonstrates a nearly linear behavior with continuous variation in  $V_g$  (-40 V to 40 V). There is a strong positive correlation between  $I_{ds}$  and  $V_g$ , implying that the ZnO:Ga MWs have a n-type semiconductor conductivity characteristic. As the ZnO:Ga MW FET device was surface-modified using PtNPs with desired dimension, electrical measurement was also conducted. The obtained  $I_{ds}$ - $V_{ds}$  curves at different  $V_g$  are shown in Figs. S6(d) and (e). From the graphs, the PtNPs@ZnO:Ga MW FET has higher  $I_{ds}$  than that of the pristine device. While at  $V_{ds} = 1.0$  V, the  $I_{ds}$ - $V_g$  plot in the Fig. S6(f) exhibits higher slope, i.e. higher transconductance gain ( $g_m$ ). The amplification factor of the FET was related by  $g_m$ , which is a function of the mobility, channel length, and temperature of the semiconductor material.

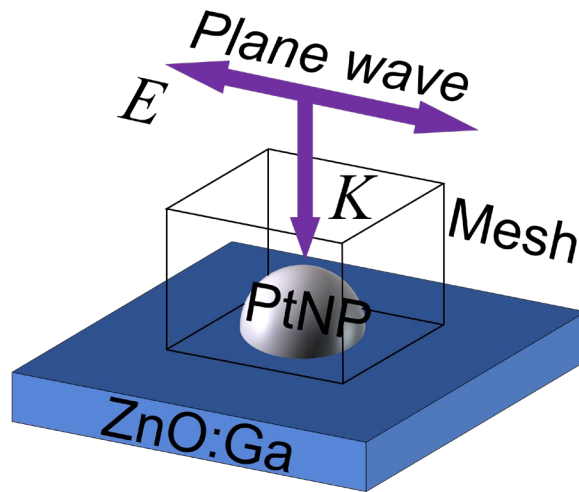

**Figure S7.** The schematics of PtNP/ZnO:Ga configuration under the plane wave excitation.

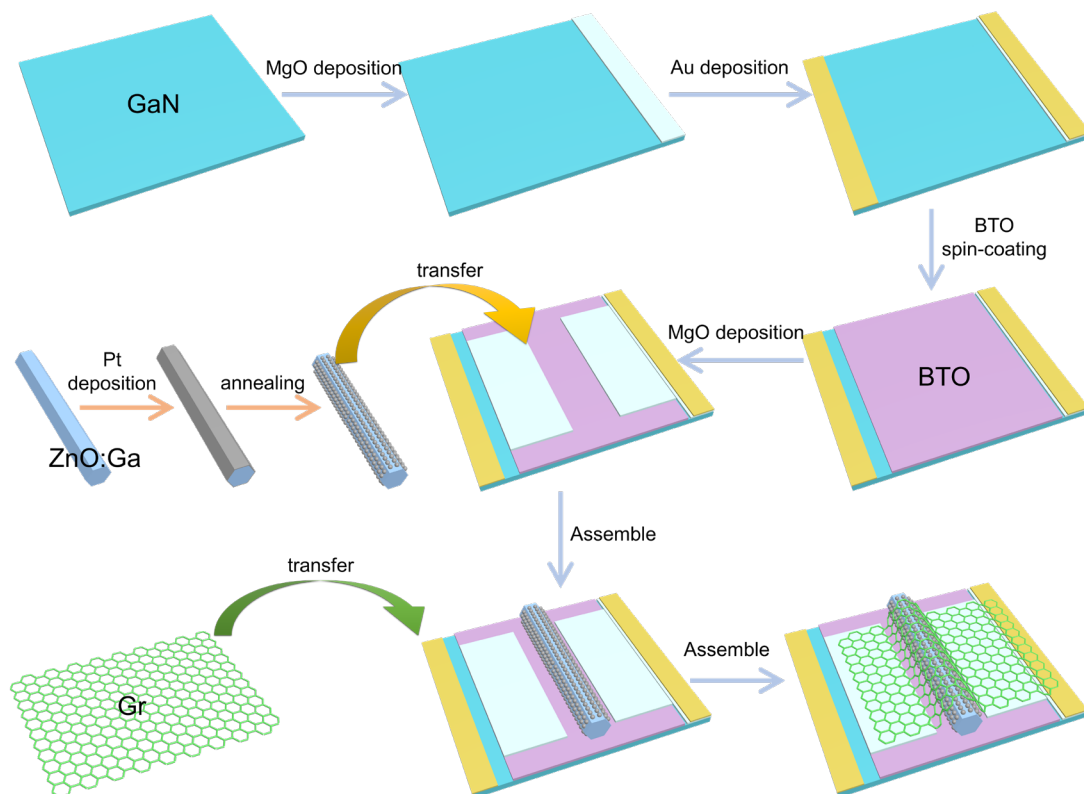

**Figure S8.** Schematic diagram of the fabrication flow of the PtNPs@ZnO:Ga/BaTiO<sub>3</sub>/GaN heterojunction PD.

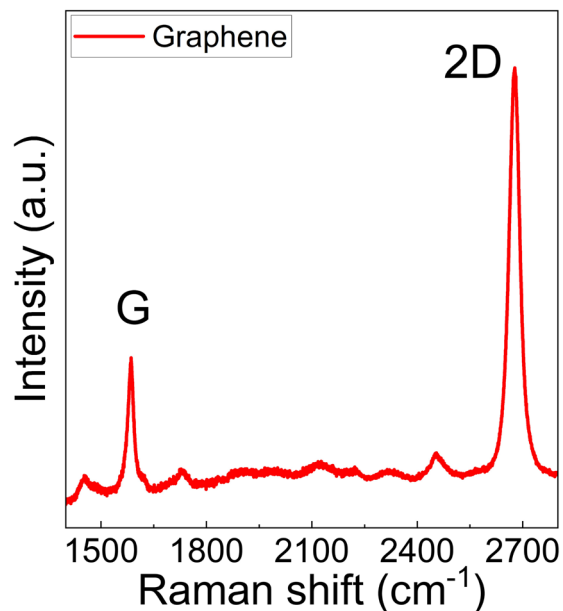

**Figure S9.** Room-temperature Raman spectra of the single-layer graphene.

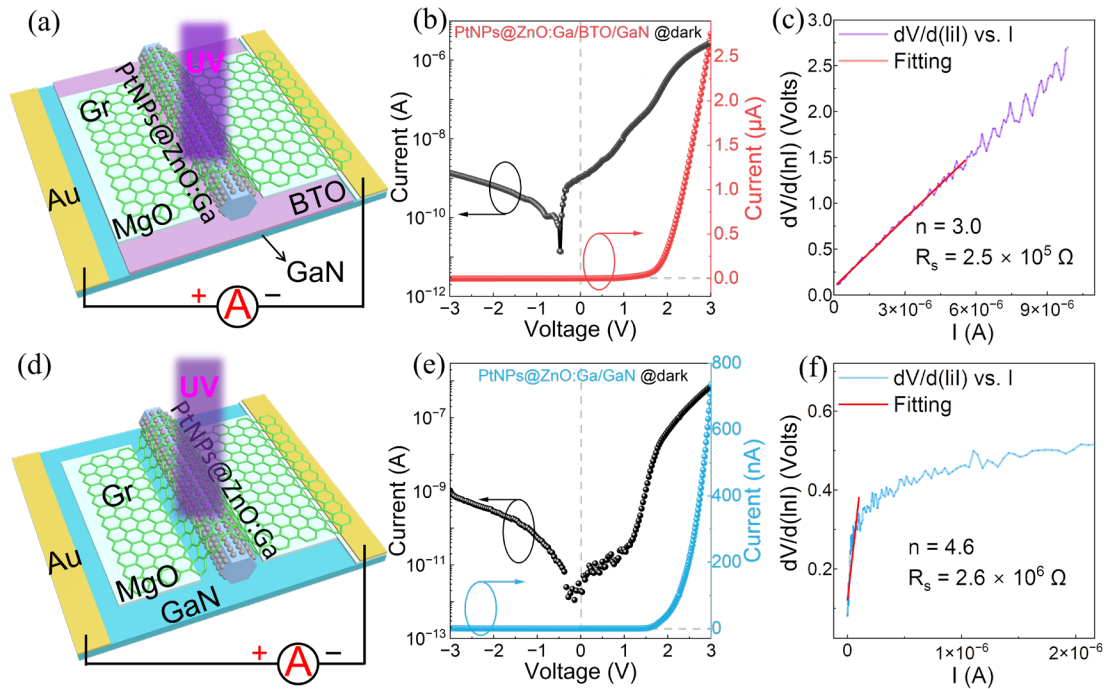

**Figure S10.** The calculation of the ideality factor and series resistance of the PtNPs@ZnO:Ga/BTO/GaN PD and PtNPs@ZnO:Ga/GaN PD. (a) Schematic architecture, (b)  $I$ - $V$  curves plotted in the dark, and (c) Experimental  $dV/d(\ln I)$  vs.  $I$  plot of the PtNPs@ZnO:Ga/BTO/GaN PD. (d) Schematic architecture, (e)  $I$ - $V$  curves plotted in the dark, and (f) Experimental  $dV/d(\ln I)$  vs.  $I$  plot of the PtNPs@ZnO:Ga/GaN PD.

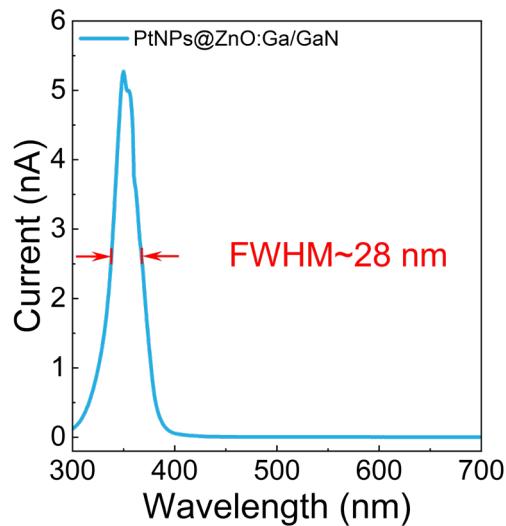

**Figure S11.** Light wavelength-dependent photocurrent of the PtNPs@ZnO:Ga/GaN PD.



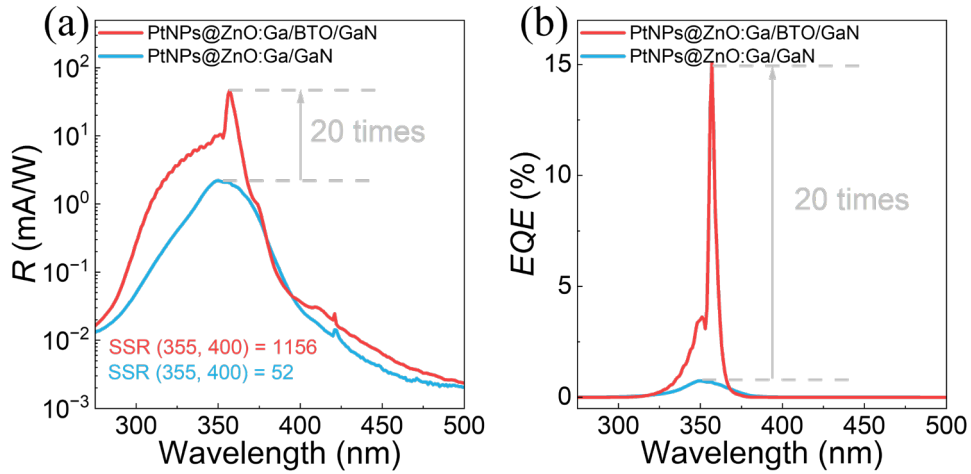

**Figure S12.** Photoresponse comparison of the PtNPs@ZnO:Ga/GaN heterojunction photodetectors, in which the devices were interfaced without and with BaTiO<sub>3</sub> nanolayer. Light wavelength-dependent (a) responsivities and (b) *EQEs* of the fabricated detectors.

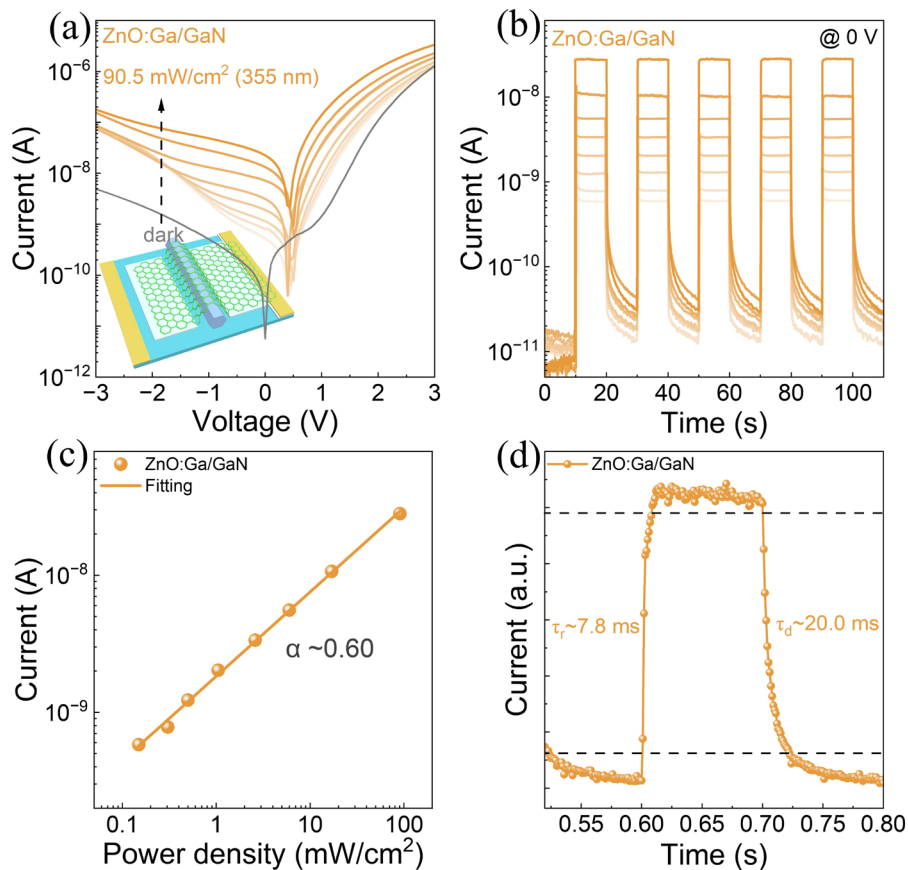

**Figure S13.** Photodetection performance of the ZnO:Ga/GaN heterojunction detector. (a) Logarithmic *I-V* characteristic curves, and (b) *I-t* curves of the ZnO:Ga/GaN PD under 355 nm irradiation with various light intensities. (c) Light power density-

dependent current of the ZnO:Ga/GaN PD. (d) Single-cycle time-dependent photoresponse characteristics under 355 nm light illumination at 0 V bias.

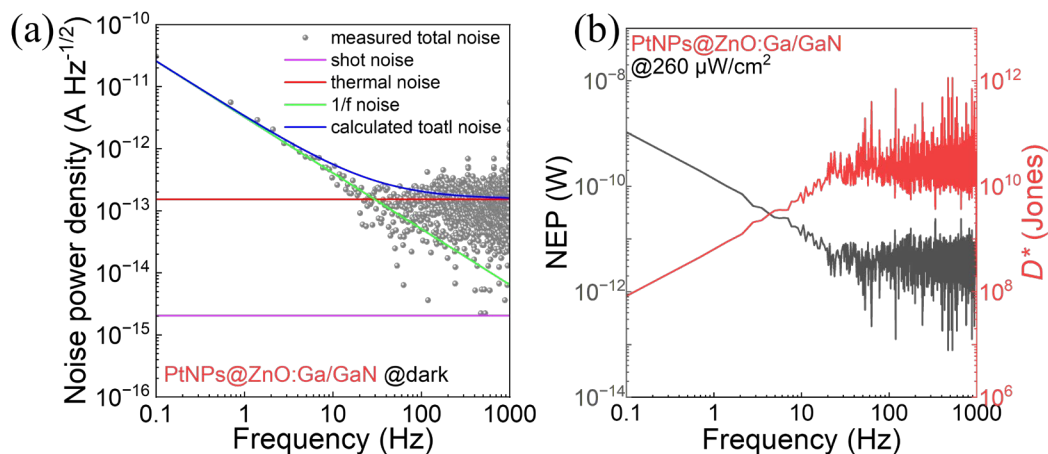

**Figure S14.** (a) Total noise power density spectrum obtained by Fourier transform of the time-domain dark current of the PtNPs@ZnO:Ga/GaN PD. (b) *NEP* and *D\** of the device when tested in a self-biasing manner.

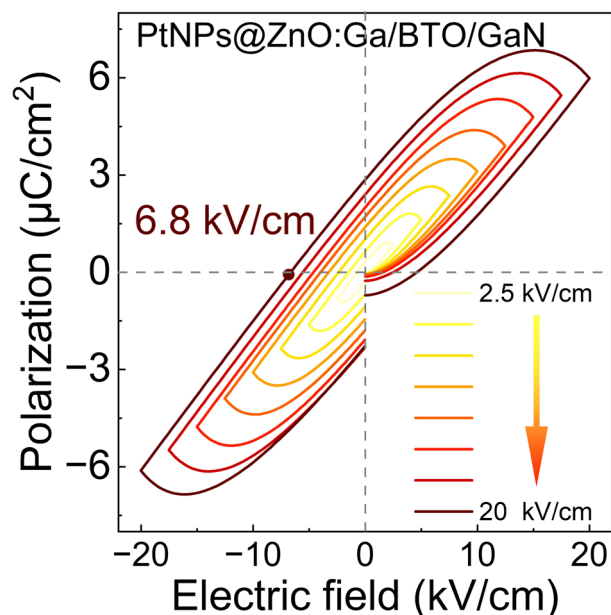

**Figure S15.** Electric field-dependent hysteresis loops of the PtNPs@ZnO:Ga/BaTiO<sub>3</sub>/GaN heterojunction device.

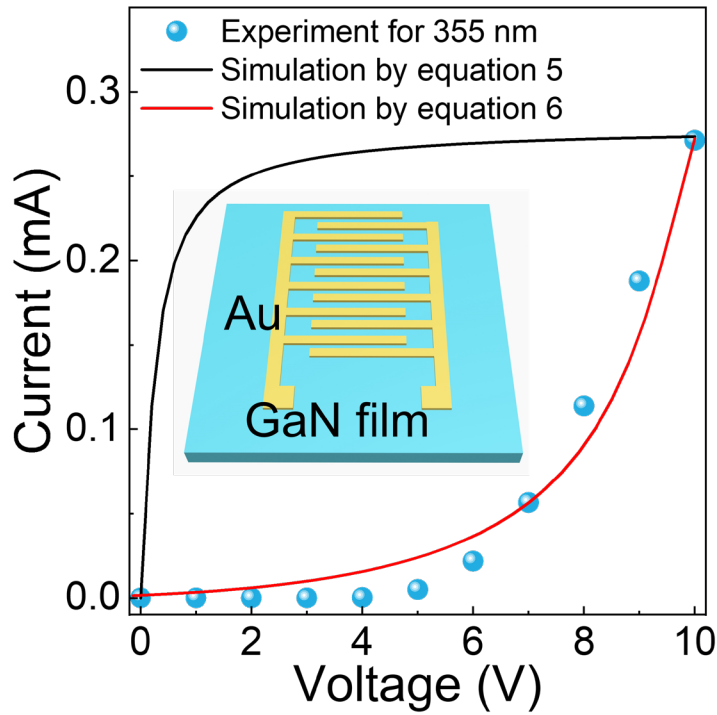

**Figure S16.** Electrical voltage-dependent photocurrent of the GaN film illuminated under 355 nm, and the calculated photocurrent using the Hecht equation and modified Hecht equation considering the exciton ionization.

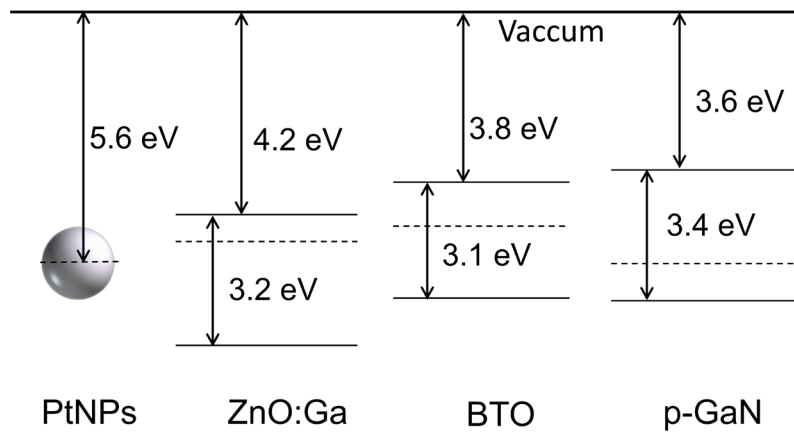

**Figure S17.** Schematic diagram of the energy band arrangement of PtNPs, ZnO:Ga, BTO, and GaN before contact.

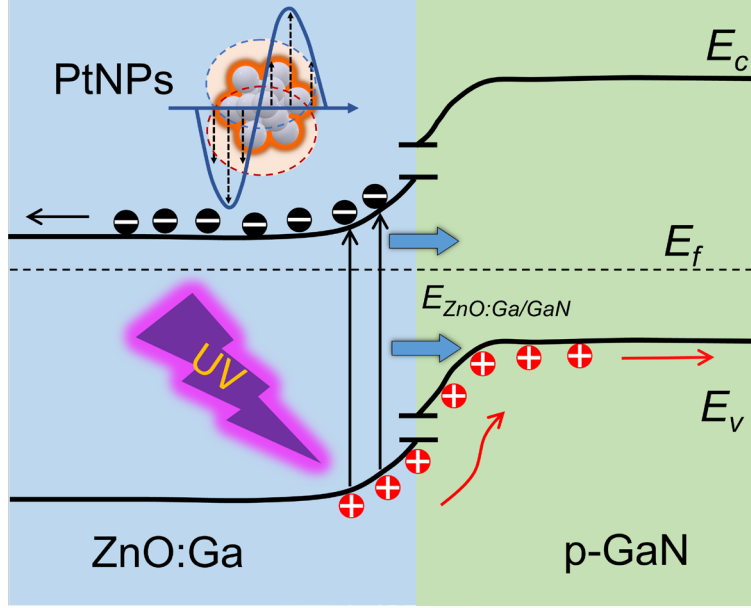

**Figure S18.** (a) The energy band diagram of PtNPs@ZnO:Ga/GaN heterojunction under UV light at zero bias.

### 1. Theoretical distribution width of depletion regions.<sup>2</sup>

The theoretical distribution width of depletion in p-GaN region ( $w_{GaN}$ ) and in n-ZnO:Ga region ( $w_{ZnO:Ga}$ ) can be evaluated through the formula:

$$w_{ZnO:Ga} = \sqrt{\frac{2\varepsilon_{ZnO:Ga}\varepsilon_0 n_{GaN} V_{in}}{en_{ZnO:Ga}(n_{ZnO:Ga} + n_{GaN})}} \quad (1)$$

$$w_{GaN} = \sqrt{\frac{2\varepsilon_{GaN}\varepsilon_0 n_{ZnO:Ga} V_{in}}{en_{GaN}(n_{ZnO:Ga} + n_{GaN})}} \quad (2)$$

Where  $\varepsilon_{ZnO:Ga}$  is relative dielectric constants of ZnO ( $\sim 8$ ),  $\varepsilon_{GaN}$  is relative dielectric constants of GaN ( $\sim 8.9$ ).  $n_{GaN}$  ( $\sim 5.0 \times 10^{19}$ ) and  $n_{ZnO:Ga}$  ( $\sim 8.2 \times 10^{17}$ ) are carrier concentrations, respectively.  $V_{in}$  is the built-in voltage ( $\sim 1.0$  V),  $\varepsilon_0$  is the permittivity of vacuum, and  $e$  is elementary charge. From (1) and (2),  $w_{ZnO:Ga}$  is calculated as 32.6 nm, and  $w_{GaN}$  is calculated as 0.5 nm.

### 2. The calculation of the electrical transport properties of ZnO:Ga MWs both with

**and without PtNPs coating.**

Based on the experimental results of Fig. S6, the electrical parameters like mobility, charge carrier concentration and conductivity, can be estimated using the following equations:

$$g_m = \frac{dI_{ds}}{dV_g} = \frac{2\pi\epsilon_0\epsilon_{SiO_2}\mu V_{ds}}{L \cosh^{-1}(1 + 2h/d)} \quad (3)$$

$$\sigma = \frac{1}{\rho} = \frac{L}{RS_{ZnO}} = nq\mu \quad (4)$$

where the  $V_{ds}$  is set to 1.0 V, the  $\epsilon_0$ ,  $\epsilon_{SiO_2}$ ,  $h$ , and  $d$  represent the vacuum electrostatic constant, the relative dielectric constant of  $SiO_2$  ( $\epsilon_{SiO_2} \sim 3.9$ ), the thickness of  $SiO_2$  ( $h \sim 300$  nm), and the diameter of a ZnO:Ga MW ( $d \sim 15$   $\mu$ m), respectively.

### **3. The simulation of GaN-based MSM structure's photocurrent using the Hecht equation and modified Hecht equation considering the exciton ionization.**

The GaN-based MSM structure was constructed to demonstrate the existence of the field-enhanced exciton ionization process within the thin film, considering that the excitons did not ionize at room temperature because of the high  $E_B$ . The current of the GaN-based MSM structure versus voltage is plotted, along with the calculated current using the modified Hecht equation with considering the field-enhanced exciton ionization,<sup>3</sup>

$$I(V) = I_0 V \frac{\mu\tau}{d^2} \left(1 - e^{-d^2/\mu\tau V}\right) \quad (5)$$

$$I(V) = I_0 e^{-(E_B - eEa_B)/k_B T} V \frac{\mu\tau}{d^2} \left(1 - e^{-d^2/\mu\tau V}\right) \quad (6)$$

where  $I_0$  is the saturation current of device, which is the current under 10 V,  $V$  is the applied bias,  $\mu$  is the carrier mobility,  $\tau$  is the carrier bulk recombination lifetime,  $d$  is the interelectrode spacing,  $E_B$  is the bulk exciton binding energy,  $e$  is the elementary charge,  $E$  is the electric intensity,  $k_B$  is the Boltzmann constant,  $T$  is the temperature,

and  $a_B$  is the Bohr radius. When considering the field-enhanced exciton ionization process,  $I_0 e^{-(E_B - eEa_B)/k_B T}$  can be regarded as the saturating current increasing with the electric intensity.

#### 4. The calculation of the ideality factor and series resistance of the heterojunction diodes.

The diode parameters are determined from the forward current-voltage ( $I$ - $V$ ) characteristics, which is usually described within the thermionic emission theory:<sup>4,5</sup>

$$I = I_0 \exp\left(\frac{qV}{nkT}\right) \quad (7)$$

where the saturation current  $I_0$  is expressed as:

$$I_0 = aA^{**}T^2 \exp\left(\frac{-q\phi_{B0}}{kT}\right) \quad (8)$$

where  $q$  is the electron charge,  $V$  is the applied voltage,  $A^{**}$  is the effective Richardson constant,  $a$  is the effective diode area,  $T$  is the absolute temperature,  $k$  is the Boltzmann constant,  $n$  is the ideality factor of diode, and  $\phi_{B0}$  is the zero bias barrier height. For values of  $V$  greater than  $nkT/q$ , the ideality factor  $n$  from Eq. (7) can be written as:<sup>6</sup>

$$n = \frac{q}{kT} \frac{\Delta V}{\Delta \ln I} \quad (9)$$

The effect of the series resistance is usually modelled with series combination of a diode and a resistor  $R_s$ . The voltage  $V_d$  across the diode can be expressed in terms of the total voltage drop  $V$  across the diode and the resistance  $R_s$ . Thus, the  $V_d = V - IR_s$  and the Eq. (7) can be expressed as:

$$I = I_0 \exp\left(\frac{q(V - IR_s)}{nkT}\right) \quad (10)$$

At low bias, the ideality factor  $n$  and the resistance  $R_s$  of a heterojunction is expressed as follows:

$$\frac{dV}{d(\ln I)} = IR_s - \frac{nkT}{q} \quad (11)$$

Thus, the slope and  $y$ -axis intercept of a plot of  $dV/d\ln I$  versus  $I$  will give  $R_s$  and  $nkT/q$ , respectively. The relevant parameters of the heterojunction diodes are calculated and summarized in the **Table I** for comparison. By introducing BTO in the PtNPs@ZnO:Ga/GaN heterojunction diode, the ideality factor and series resistance of the PtNPs@ZnO:Ga/BTO/GaN heterojunction diode are smaller than that of the PtNPs@ZnO:Ga/GaN heterojunction diode. The deviation of the ideality factor for both heterojunction diodes may originate from the interface or surface recombination of electrons and holes.

**Table I.** The dark  $I$ - $V$  characteristics of PtNPs@ZnO:Ga/GaN heterojunction diode and PtNPs@ZnO:Ga/BTO/GaN heterojunction diode.

|                                  | PtNPs@ZnO:Ga/GaN  | PtNPs@ZnO:Ga/BTO/GaN |
|----------------------------------|-------------------|----------------------|
| Rectification ratio at $\pm 3$ V | $7.0 \times 10^2$ | $2.0 \times 10^3$    |
| Ideality factor ( $n$ )          | 4.6               | 3.0                  |
| Series resistance ( $\Omega$ )   | $2.6 \times 10^6$ | $2.5 \times 10^5$    |

## Reference

1. Y. Zhang, X. Y. Zhao, J. X. Chen, S. Y. Li, W. Yang and X. S. Fang, *Adv. Funct. Mater.*, 2020, **30**, 1907650.
2. P. Wan, M. Jiang, T. Xu, Y. Liu, X. Fang and C. Kan, *Adv. Opt. Mater.*, 2021, **10**, 2101851.
3. A. Mohite, J.-T. Lin, G. Sumanasekera and B. W. Alphenaar, *Nano Lett.*, 2006, **6**, 1369-1373.
4. S. K. Cheung and N. W. Cheung, *Appl. Phys. Lett.*, 1986, **49**, 85-87.
5. A. Keffous, M. Siad, S. Mamma, Y. Belkacem, C. Lakhdar Chaouch, H. Menari, A. Dahmani and W. Chergui, *Appl. Surf. Sci.*, 2003, **218**, 337-343.
6. L. Zeng, D. Wu, J. Jie, X. Ren, X. Hu, S. P. Lau, Y. Chai and Y. H. Tsang, *Adv. Mater.*, 2020, **32**, e2004412.
